## SIZE OF MATURITY IN MALE GOLDEN KING CRAB, *LITHODES AEQUISPINUS* (ANOMURA: LITHODIDAE)

A. J. Paul and J. M. Paul

University of Alaska, Institute of Marine Science, Seward Marine Center Laboratory,  
Post Office Box 730, Seward, Alaska 99664 U.S.A.  
(e-mail: ffajp@uaf.edu)

### A B S T R A C T

Typically  $\geq 90\%$  of the eggs in clutches fertilized by hardshell Prince William Sound *Lithodes aequispinus* males  $\geq 107$  mm carapace length initiated division. Golden king crab males with only one chela and those with post-molt carapaces  $\geq 11$  days old were effective parents. Some test males had exclusive access to three ripe females. Their first and second mates all produced viable clutches with 81–100% of eggs exhibiting development. Not all males induced a third female to ovulate. The percentage of eggs initiating division in the clutches of their third potential female mates ranged from 56 to 100%.

The Alaskan fishery for *Lithodes aequispinus* Benedict, 1894, has increased dramatically in recent times as stocks of other crab species have declined. The life history of this species is poorly described, and the management plan for conserving golden king crab stocks was developed without much information on their reproductive capacity. Because they often live in deep water, typically on untrawlable bottoms in remote sites, field studies on the reproductive habits of this species are problematic. The fishery only harvests males, and they must have carapace lengths (CL)  $\geq 140$ –180 mm depending on the geographical area they inhabit (Donaldson and Donaldson, 1992). The size regulations were set to allow males some opportunity to breed before they recruited to the fishery. However, prior to this study estimates for the size at maturity for male golden king crabs were based only on chela and carapace measurements (Jewett *et al.*, 1985; Somerton and Otto, 1986).

The size of maturity for males, the effect of their molt stage, their ability to breed more than one female, and the effect of chela loss on ability to fertilize females, was examined through laboratory breeding experiments. As a conservation measure the management program tries to leave enough males on the grounds to fertilize all females. Prior to this study there had been no experiments done that described the size and shell condition of males that were capable of breeding. The pri-

mary objective of these observations was to determine if males smaller than the size limit set by the fishery regulations were capable of fertilizing females. “Old-shelled” males missing chela have low market value and are often released by fishermen. The breeding tests with males missing a chela were done so fishery managers would know if these discarded males could be effective parents. Breeding tests using males that molted in captivity were done so resource managers could predict the impact on fertilization rates if “newshell” males were numerous.

### MATERIALS AND METHODS

Crabs needed for the study were captured with crab pots fished at depths of 108 to 152 m on the western side of Prince William Sound, Alaska. After capture the specimens were transported to the Seward Marine Center Laboratory by floatplane. No mortalities occurred during the transport process. Crab collections were made during 11–14 November 1996, 1 May 1997, and 10–20 October 1998, and observations of captives continued until September 1999.

The carapace length (CL) of all crabs was measured to the nearest mm, and they were tagged with a numbered plastic disk attached to the leg with a plastic cable tie. The chela height (CH) of males was measured at its widest point for the largest chela. Crabs were held in 800–1,000 l tanks with ten crabs of one sex in each tank. The sea water in tanks was exchanged  $\geq 100\%$  per h so its temperature was the same as the incoming sea water. The sea water came from 75-m depth in Resurrection Bay, Seward, Alaska. The temperature in the tanks followed the fjord's 75-m depth seasonal cycle ranging from 3.5 to 10°C. Females were isolated from test males until they molted. Females must molt prior to mating and have no ability to store sperm. Crabs were fed Mondays and

Table 1. The percentage of eggs dividing in clutches of *Lithodes aequispinus* mated to hardshell males of varying carapace length.

| Test male CL (mm) | Female CL (mm) | Percentage eggs dividing with test male parent | Percentage eggs dividing with male 2 parent |
|-------------------|----------------|------------------------------------------------|---------------------------------------------|
| 95                | 126            | –                                              | 100                                         |
| 99                | 135            | –                                              | 71                                          |
| 101               | 133            | 71                                             |                                             |
| 107               | 133            | 98                                             |                                             |
| 107               | 148            | 94                                             |                                             |
| 118               | 122            | 99                                             |                                             |
| 121               | 138            | 98                                             |                                             |
| 123               | 130            | 96                                             |                                             |
| 123               | 130            | 100                                            |                                             |
| 128               | 130            | 100                                            |                                             |
| 130               | 130            | 99                                             |                                             |
| 131               | 129            | 99                                             |                                             |
| 132               | 121            | 100                                            |                                             |
| 133               | 157            | 99                                             |                                             |
| 133               | 135            | 100                                            |                                             |
| 134               | 130            | 100                                            |                                             |
| 136               | 149            | 100                                            |                                             |
| 138               | 144            | 99                                             |                                             |
| 138               | 137            | 100                                            |                                             |
| 139               | 137            | 91                                             |                                             |
| 141               | 136            | 96                                             |                                             |
| 141               | 128            | 100                                            |                                             |
| 144               | 126            | 99                                             |                                             |
| 145               | 129            | 100                                            |                                             |
| 146               | 138            | 98                                             |                                             |
| 146               | 130            | 100                                            |                                             |
| 147               | 129            | 100                                            |                                             |
| 148               | 128            | 63                                             |                                             |
| 148               | 129            | 99                                             |                                             |
| 150               | 128            | 90                                             |                                             |
| 153               | 141            | 99                                             |                                             |
| 155               | 128            | 100                                            |                                             |

Thursdays to excess with a repeating cycle of the following foods: whole Pacific herring *Clupea pallasii* Valenciennes, 1847, followed by fillet of coho salmon *Oncorhynchus kisutch* (Walbaum, 1792), then *Octopus dofleini* (Wulker, 1910) or whole squid (species unknown). Excess food was removed from tanks on Wednesday mornings and Friday afternoons.

There were four major categories of test males. The first was “hardshell” males that had been in captivity  $\geq 12$  months, and they were from 95 to 155 mm CL ( $n = 32$ ). This group is referred to as “hardshell” males in this report. The next group of hardshell males had only one of their chela, CL  $\geq 133$ –150 mm ( $n = 6$ ). All of these hardshell “one-claw” males had been captive for at least 12 months before the tests. This group is referred to as “one-claw” males in the text. The third group of males had molted in the laboratory, so it was known how long after their molt they had access to a newly molted ripe female ( $n = 19$ ). These males had molted between 1 and 71 d prior to being put into tanks with ripe females. This group of males is referred to as “newshell” males in this report. These newshell males had CL  $\geq 115$  mm. The fourth test group were males ( $n = 17$ ) that were given access to three ripe females to see if they could fertilize more than one female. The length of time during which

Table 2. The percentage of eggs dividing in clutches of *Lithodes aequispinus* mated to hardshell males of varying carapace length that had only one right (R) or left (L) chela.

| Male carapace length (mm) | Male chela height (mm)/right or left | Female carapace length (mm) | Percentage eggs dividing |
|---------------------------|--------------------------------------|-----------------------------|--------------------------|
| 133                       | 12R                                  | 141                         | 100                      |
| 138                       | 39R                                  | 152                         | 100                      |
| 139                       | 22L                                  | 144                         | 91                       |
| 144                       | 9R                                   | 126                         | 99                       |
| 148                       | 23L                                  | 134                         | 63                       |
| 150                       | 40R                                  | 134                         | 90                       |

males had to fertilize all three females ranged from 1 to 41 d. This group of males is called “repeat breeders” in this manuscript.

In all breeding tests both parents were placed in a 0.5-m deep tank so the female brood pouch could be examined without separating grasping pairs. Then the pairs were watched for copulation, and the females were examined every 12 h afterward to see when a new clutch was extruded. If a male in any of the above observations failed to induce a female to extrude a clutch within 3 d after her molt, the test male was removed. Then another, larger hardshell male (CL  $\geq 180$  mm with both chelae) was put in with her to see if she would ovulate in the presence of an obviously mature male.

After ovulation, females were isolated and held until eggs reached  $\geq 64$ -cell stage. Then a group of at least 100 eggs from each pleopod were randomly selected and examined under a microscope for cell division to determine if the male was fertile.

## RESULTS

Neither of the two smallest hardshell test males (95- and 99-mm CL) induced females to ovulate, although clutches were produced by those females when males  $\geq 180$ -mm CL were put in their tanks (Table 1). The smallest hardshell male to fertilize an egg clutch was 101-mm CL with 71% of the eggs initiating division. Typically  $\geq 90\%$  of the eggs in clutches fertilized by hardshell males  $\geq 107$  mm CL initiated division (Table 1).

There were six males with only one chela that were put with ripe females. All the females they attended produced egg clutches with 63 to 100% eggs dividing (Table 2). Two of these males had only a small regenerating chela (9–12-mm CH).

Females were presented to 19 males that had molted between 1 and 71 days prior to the breeding test (Table 3). Three males that had molted between 1 and 8 days prior to the breeding experiment did not induce females to ovulate. All three females produced viable clutches with other hardshell males. The

Table 3. The percentage of eggs dividing in clutches of *Lithodes aequispinus* mated to recently molted newshell males.

| Number of days after male molt breeding occurred | Male carapace length (mm) | Male chela height (mm) | Female carapace length (mm) | Percentage eggs dividing in clutch |
|--------------------------------------------------|---------------------------|------------------------|-----------------------------|------------------------------------|
| 1                                                | 133                       | 30                     | 135                         | No eggs*                           |
| 4                                                | 117                       | 28                     | 149                         | No eggs*                           |
| 7                                                | 141                       | 30                     | 136                         | 96                                 |
| 8                                                | 162                       | 42                     | 139                         | No eggs*                           |
| 11                                               | 161                       | 47                     | 148                         | 99                                 |
| 15                                               | 163                       | 45                     | 123                         | 99                                 |
| 16                                               | 148                       | 23                     | 128                         | 63                                 |
| 19                                               | 157                       | 37                     | 132                         | 100                                |
| 20                                               | 164                       | 44                     | 141                         | 100                                |
| 21                                               | 153                       | 41                     | 141                         | 99                                 |
| 23                                               | 127                       | 27                     | 141                         | 100                                |
| 23                                               | 148                       | 38                     | 143                         | 99                                 |
| 26                                               | 145                       | 34                     | 129                         | 100                                |
| 31                                               | 124                       | 29                     | 144                         | 100                                |
| 32                                               | 141                       | 31                     | 128                         | 100                                |
| 42                                               | 151                       | 36                     | 140                         | 99                                 |
| 55                                               | 119                       | 26                     | 138                         | 100                                |
| 57                                               | 115                       | 27                     | 145                         | 99                                 |
| 71                                               | 129                       | 29                     | 142                         | 99                                 |

\* Indicates female produced a viable clutch with a different male.

clutch of a female bred by a male with a carapace 16 days old had only 63% of the eggs initiate division. However, the other males whose new carapaces were at least 11 days old fertilized females with  $\geq 95\%$  of the eggs in clutches dividing.

There were 17 males with exclusive access to three ripe females (Table 4). In all cases their first and second female mates produced viable clutches. In the clutches of females first to be bred, 81 to 100% of the eggs initiated division. The egg division rates for the second female mates were 78 to 100%. There were 11 second-to-be-bred females that were fertilized one day or less after the first female had been bred. In all 11 cases  $\geq 91\%$  of the eggs were dividing. Two of the females that were third possible mates did not extrude eggs in the presence of the test males, but they produced viable clutches with another male. The other 15 males bred their third mate, with 56 to 100% of the eggs in clutches dividing.

## DISCUSSION

In Prince William Sound, where our golden king crabs were captured, males must have CL  $\geq 178$  mm to be legally marketed (Donaldson and Donaldson, 1992). All the males used in these breeding tests were smaller than

Table 4. The percentage of eggs dividing in clutches of *Lithodes aequispinus* mated to hardshell males with access to three newly molted adult females.

| Days between breeding | Male carapace length (mm) | Male chela height (mm) | Female carapace length (mm) | Percentage eggs dividing in clutch |
|-----------------------|---------------------------|------------------------|-----------------------------|------------------------------------|
|                       | 151                       | 36                     | 140                         | 99                                 |
| <1                    |                           |                        | 141                         | 99                                 |
| <1                    |                           |                        | 139                         | 99                                 |
|                       | 164                       | 44                     | 146                         | 99                                 |
| 1                     |                           |                        | 139                         | 98                                 |
| <1                    |                           |                        | 128                         | 98                                 |
|                       | 115                       | 27                     | 145                         | 99                                 |
| 1                     |                           |                        | 151                         | 100                                |
| 1                     |                           |                        | 144                         | 100                                |
|                       | 119                       | 26                     | 138                         | 100                                |
| 1                     |                           |                        | 136                         | 100                                |
| 1                     |                           |                        | 126                         | 93                                 |
|                       | 124                       | 29                     | 144                         | 100                                |
| 1                     |                           |                        | 146                         | 100                                |
| 1                     |                           |                        | 152                         | No eggs*                           |
|                       | 127                       | 24                     | 141                         | 100                                |
| 1                     |                           |                        | 144                         | 98                                 |
| 1                     |                           |                        | 132                         | No eggs*                           |
|                       | 130                       | 30                     | 135                         | 98                                 |
| 1                     |                           |                        | 143                         | 91                                 |
| 1                     |                           |                        | 142                         | 99                                 |
|                       | 137                       | 30                     | 135                         | 100                                |
| 1                     |                           |                        | 148                         | 95                                 |
| 1                     |                           |                        | 137                         | 98                                 |
|                       | 129                       | 29                     | 142                         | 99                                 |
| 1                     |                           |                        | 137                         | 98                                 |
| 2                     |                           |                        | 142                         | 99                                 |
|                       | 142                       | 24                     | 116                         | 100                                |
| 2                     |                           |                        | 139                         | 99                                 |
| 1                     |                           |                        | 134                         | 100                                |
|                       | 148                       | 38                     | 143                         | 99                                 |
| 2                     |                           |                        | 139                         | 98                                 |
| 1                     |                           |                        | 149                         | 73                                 |
|                       | 117                       | 28                     | 151                         | 81                                 |
| 1                     |                           |                        | 141                         | 97                                 |
| 3                     |                           |                        | 145                         | 99                                 |
|                       | 124                       | 23                     | 128                         | 99                                 |
| 2                     |                           |                        | 142                         | 100                                |
| 2                     |                           |                        | 151                         | 98                                 |
|                       | 127                       | 29                     | 143                         | 91                                 |
| 3                     |                           |                        | 144                         | 96                                 |
| 1                     |                           |                        | 145                         | 56                                 |
|                       | 133                       | 32                     | 140                         | 100                                |
| 1                     |                           |                        | 117                         | 100                                |
| 5                     |                           |                        | 130                         | 100                                |
|                       | 128                       | 30                     | 138                         | 97                                 |
| 10                    |                           |                        | 142                         | 78                                 |
| 2                     |                           |                        | 138                         | 89                                 |
|                       | 159                       | 44                     | 126                         | 100                                |
| 2                     |                           |                        | 130                         | 100                                |
| 13                    |                           |                        | 128                         | 100                                |

\* Indicates female produced a viable clutch with a different male.

that. Our results show that sublegal-size males  $\geq 110$ -mm CL can be successful parents. In Prince William Sound a male golden king crab would undergo six or seven molts to grow from 110 to 170 mm (Paul and Paul,

2000), so they have more than one chance to breed prior to reaching a harvestable size. In British Columbia, Canada, male golden king crabs were thought to mature at  $\approx 114$ -mm CL (Jewett *et al.*, 1985) vs. 130-mm CL in the Bering Sea (Somerton and Otto, 1986) based on chela morphometrics.

There were several instances of golden king crab males mating with females larger than themselves (Tables 1–4). Male red king crab *Paralithodes camtschaticus* (Tilesius, 1815) can also fertilize females that are larger than themselves (Paul and Paul, 1990). This is not unexpected because the females in both king crab species are softshell when mating occurs. Previous work demonstrated that for ten days after molting red king crab males are incapable of mating (Powell *et al.*, 1972), and our results show golden king crab have a similar recuperation period.

Our breeding experiments did not determine the maximum number of females a male could breed, but that may not be a major determining factor in golden king crab reproductive success. Red king crab breed synchronously in the spring (Paul and Paul, 1990, 1997), so the larvae can feed on the diatom bloom (Paul *et al.*, 1990). In red king crabs, having enough mature males on the breeding grounds during the brief mating period is important to insure all females produce clutches. However in this study, and in the Bering Sea (Somerton and Otto, 1986), golden king crab females hatched eggs, molted, and bred throughout the year. Hatching does not need to occur exclusively during the spring phytoplankton and zooplankton blooms because golden king crab larvae do not feed and can tolerate a wide range of temperatures (Shirley and Zhou, 1997; Paul and Paul, 1999). With a protracted breeding period individual males may be less likely to run out of sperm given their ability to fertilize two or three females in three days or less (Table 4). Of course, there have to be sufficient numbers of mature males on the breeding grounds, so all females get fertilized. There appears to be some migratory behavior in this species (Slone, 1985; Somerton and Otto, 1986) and how it relates to individual reproductive cycles is yet to be described.

#### ACKNOWLEDGEMENTS

This work is a result of research sponsored by the Alaska Sea Grant College Program, cooperatively sup-

ported by NOAA, Office of Sea Grant and Extramural Programs, Department of Commerce, under grant number NA46RG0104 project number R/06–36 and the University of Alaska with funds appropriated by the state. L. Clayton, C. Adams, S. Moreland, and P. Shoemaker helped with the laboratory work. Facilities were provided by the University of Alaska Institute of Marine Science's Seward Marine Center laboratory. This is contribution number 2643 from the Institute of Marine Science, University of Alaska. The crew of the *Montague*, with C. Trowbridge and W. Bechtol of the Alaska Department of Fish and Game, supplied the experimental animals.

#### LITERATURE CITED

- Donaldson, W. E., and W. K. Donaldson. 1992. A review of the history and justification for size limits in Alaskan king, Tanner, and snow crab fisheries.—Alaska Department of Fish and Game Fishery Research Bulletin 92–02: 1–21.
- Jewett, S. C., N. A. Sloan, and D. A. Somerton. 1985. Size at sexual maturity and fecundity of the fjord-dwelling golden king crab *Lithodes aequispina* Benedict from northern British Columbia.—Journal of Crustacean Biology 5: 377–385.
- Paul, A. J., and J. M. Paul. 1997. Breeding success of large male red king crab *Paralithodes camtschaticus* with multiparous mates.—Journal of Shellfish Research 16: 379–381.
- , and ———. 1999. Development of golden king crab *Lithodes aequispinus* (Anomura: Lithodidae) larvae reared at different temperatures.—Journal of Crustacean Biology 19: 42–45.
- , and ———. 2000. Changes in chela heights and carapace lengths in male and female golden king crab, *Lithodes aequispinus*, after molting in the laboratory.—Alaska Fisheries Research Bulletin 6: 8–15.
- , ———, and K. O. Coyle. 1990. Growth of stage I king crab larvae of *Paralithodes camtschatica* (Tilesius) (Decapoda: Lithodidae) in natural communities.—Journal of Crustacean Biology 10: 175–183.
- Paul, J. M., and A. J. Paul. 1990. Breeding success of sublegal size male red king crab *Paralithodes camtschatica* (Decapoda, Lithodidae).—Journal of Shellfish Research 9: 29–32.
- Powell, G. C., B. Shafford, and M. Jones. 1972. Reproductive biology of young adult king crabs *Paralithodes camtschatica* (Tilesius) at Kodiak, Alaska.—Proceedings National Shellfish Association 63: 77–87.
- Shirley, T. C., and S. Zhou. 1997. Lecithotrophic development of the golden king crab *Lithodes aequispinus* (Anomura: Lithodidae).—Journal of Crustacean Biology 17: 207–216.
- Sloan, N. A. 1985. Life history characteristics of fjord-dwelling golden king crabs *Lithodes aequispina*.—Marine Ecology Progress Series 22: 219–228.
- Somerton, D. A., and R. S. Otto. 1986. Distribution and reproductive biology of the golden king crab, *Lithodes aequispina*, in the eastern Bering Sea.—Fishery Bulletin 84: 571–584.

RECEIVED: 13 April 2000.

ACCEPTED: 18 October 2000.
